# Supplementary material
Source: Springer Nature journal article supplement (https://www.springermedizin.de/resource/supplementary/12987_2009_306_MOESM6_ESM.pdf/9611756)

POSITIVE CONTROL

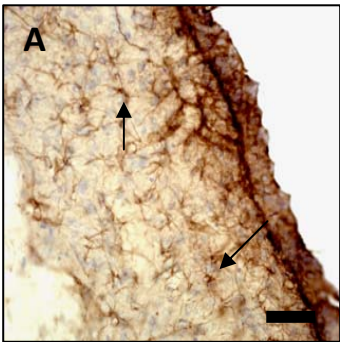

CHOROID PLEXUS

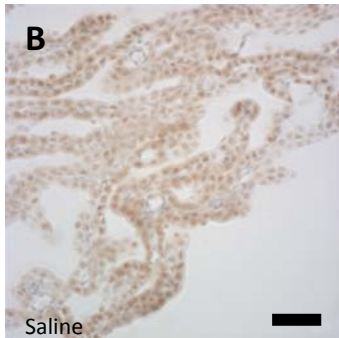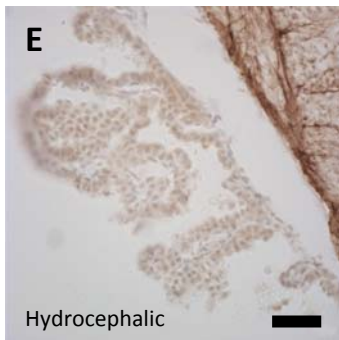

CORTEX

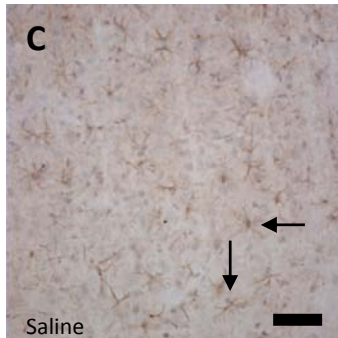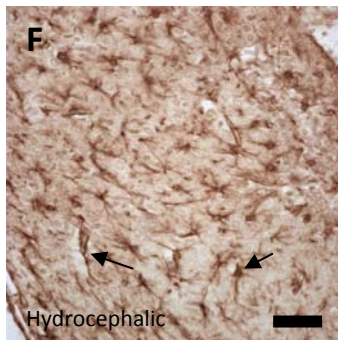

HIPPOCAMPUS

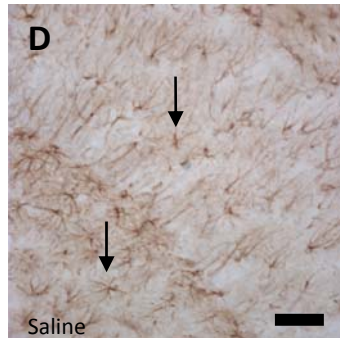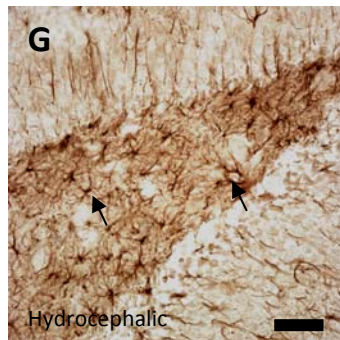

Supplement: MOESM6 [file 9611756]
